# Supplementary material for: Genetic dynamics in untreated CLL patients with either stable or progressive disease: a longitudinal study
Source: Springer Nature journal article supplement (doi:10.1186/s13045-019-0802-x), 2019-11-19
Supplement: MOESM1 [file 17406234]

**Supplementary table 1. Molecular and clinical features of all patients included in the study.** FTP: first time point; LTP: last time point; WBC, white blood cell; NA: no data available; MBL: monoclonal B-cells lymphocytosis; IGHV homology mutated = IGHV homology<98%; IGHV homology unmutated = IGHV homology>98%; Zap-70 positive: Zap-70>20%; Zap-70 negative: Zap-70<20%

| Stable CLL |                   |         |                         |                        |                                    |                      |               |        |                               |                 |                               |                 |              |           |           |                     |                      |          |  |
|------------|-------------------|---------|-------------------------|------------------------|------------------------------------|----------------------|---------------|--------|-------------------------------|-----------------|-------------------------------|-----------------|--------------|-----------|-----------|---------------------|----------------------|----------|--|
| ID         | Date of Diagnosis | FTP LTP | Date of First treatment | Date of last follow-up | Time frame (FTP-Date of diagnosis) | Time frame (LTP-FTP) | IGHV homology | Zap-70 | WBC (x10 <sup>9</sup> /liter) | ALC (%from WBC) | CD19+/CD5+ (%from PBMC) clone | Binet/Rai Stage | Therapy need | Reference | CNV (pCR) | Mutational analysis | CNV (SNP genotyping) | Affy ID  |  |
| CLL478     | May-99            | Feb-03  |                         | Feb-10                 | 1375.00                            | 1022.00              | mut           | neg    | 19                            | NA              | 0                             | 0               | No           | 1         | yes       | yes                 | yes                  | A2317-16 |  |
|            |                   | Nov-05  |                         |                        |                                    |                      |               |        | 18.7                          | 47              | 0                             | 0               |              |           | yes       | yes                 | yes                  | A2317-15 |  |
|            |                   | Jan-02  |                         | Jul-05                 | 6195.00                            | 441.00               | mut           | neg    | 21                            | 82.4            | NA                            | NA              | No           | 1         | yes       | yes                 | yes                  | A2317-18 |  |
| CLL594     | Dec-03            | Nov-00  |                         |                        |                                    |                      | mut           | neg    | 24                            | 73.6            | 1                             | 1               | No           | 1         | yes       | yes                 | yes                  | A2317-17 |  |
|            |                   | Jan-02  |                         |                        |                                    |                      |               |        | 11.3                          | 74              | 1                             | 1               | No           | 1         | yes       | yes                 | yes                  | A2317-20 |  |
|            |                   | Apr-00  |                         | Mar-18                 | 847.00                             | 2931.00              | mut           | neg    | 12.7                          | 76              | 2                             | 2               |              |           | yes       | yes                 | yes                  | A2317-19 |  |
| CLL534     | Jun-00            | Oct-00  |                         | Nov-17                 | 144.00                             | 2432.00              | mut           | pos    | 10.2                          | 41              | 0                             | 0               | No           | 1         | yes       | yes                 | yes                  | A2317-22 |  |
|            |                   | Jun-07  |                         |                        |                                    |                      |               |        | 14                            | 53              | 1                             | 1               |              |           | yes       | yes                 | yes                  | A2317-21 |  |
|            |                   | Jan-02  | Jul-12                  | Feb-18                 | 1076.00                            | 980.00               | unmut         | pos    | 17.3                          | 63              | 1                             | 1               | Yes          | 1         | yes       | yes                 | yes                  | A2317-24 |  |
| CLL538     | Jul-99            | Feb-05  |                         |                        |                                    |                      | unmut         | pos    | 9.9                           | 65              | 2                             | 2               |              |           | yes       | yes                 | yes                  | A2317-23 |  |
|            |                   | May-11  |                         | Jul-18                 | 1988.00                            | 741.00               | mut           | neg    | 48.2                          | 87.3            | 72.3                          | BI              | No           | 2         | yes       | yes                 | yes                  | A2317-01 |  |
|            |                   | May-13  |                         |                        |                                    | 1622.00              |               |        | 88                            | NA              | 94.1                          | BI              | No           | 2         | no        | yes                 | yes                  | A2317-02 |  |
| LLC003     | Dec-05            | Oct-15  |                         |                        |                                    |                      | mut           | neg    | 52                            | 93.4            | 80.6                          | BI              | No           | 2         | yes       | yes                 | yes                  | A2317-03 |  |
|            |                   | May-11  |                         | May-18                 | 2755.00                            | 660.00               | mut           | neg    | 50                            | 86              | 83.1                          | BI              | No           | 2         | yes       | yes                 | yes                  | A2317-04 |  |
|            |                   | Mar-13  |                         |                        |                                    |                      |               |        | 26                            | 91.9            | 88.1                          | BI              | No           | 2         | yes       | yes                 | yes                  | A2317-05 |  |
| LLC008     | Aug-08            | Mar-11  |                         | Jun-17                 | 1027.00                            | 420.00               | unmut         | neg    | 15.7                          | 65              | 50.9                          | AO              | No           | 2         | yes       | yes                 | yes                  | A2317-06 |  |
|            |                   | Jul-12  |                         |                        |                                    |                      |               |        | 16                            | 72              | 60                            | AO              |              |           | yes       | yes                 | yes                  | A2317-06 |  |
|            |                   | Jul-12  |                         |                        |                                    |                      |               |        | 16                            | 72              | 60                            | AO              |              |           | yes       | yes                 | yes                  | A2317-06 |  |
| LLC012A    | Oct-03            | Feb-12  |                         | Dec-17                 | 3065.00                            | 1399.00              | mut           | neg    | 15                            | 55              | 27.6                          | AO              | No           | 2         | yes       | no                  | no                   |          |  |
|            |                   | Dec-15  |                         |                        |                                    |                      |               |        | 9                             | 44              | 14.1                          | AO              |              |           | yes       | no                  | no                   |          |  |
|            |                   | Dec-15  |                         |                        |                                    |                      |               |        | 9                             | 44              | 14.1                          | AO              |              |           | yes       | no                  | no                   |          |  |
| LLC014     | Sep-09            | Jul-11  |                         | Aug-18                 | 679.00                             | 931.00               | mut           | neg    | 54                            | 82.6            | NA                            | All             | Yes          | 2         | yes       | yes                 | yes                  |          |  |
|            |                   | Mar-12  | Sep-16                  |                        |                                    |                      |               |        | 73                            | 77.7            | NA                            | All             |              |           | yes       | yes                 | yes                  |          |  |
|            |                   | Oct-14  |                         |                        |                                    |                      |               |        | 70                            | 84              | 83.9                          | All             |              |           | no        | no                  | no                   |          |  |
| LLC020     | Mar-07            | Oct-11  |                         | Apr-18                 | 1885.00                            | 826.00               | unmut         | neg    | 27                            | 94              | 59.5                          | AO              | No           | 2         | yes       | no                  | no                   |          |  |
|            |                   | Jan-14  |                         |                        |                                    |                      |               |        | 28                            | 84.4            | 61.1                          | All             |              |           | yes       | no                  | no                   |          |  |
|            |                   | Jan-16  |                         |                        |                                    |                      |               |        | 29                            | 85.5            | 53.9                          | AO              | No           | 2         | yes       | no                  | yes                  | A3288-01 |  |
| LLC021     | May-08            | Oct-11  |                         | Feb-18                 | 1258.00                            | 1561.00              | mut           | neg    | 15                            | 60              | 40.7                          | AO              | No           | 2         | yes       | no                  | yes                  | A3288-01 |  |
|            |                   | Jan-16  |                         |                        |                                    |                      |               |        | 29                            | 85.5            | 53.9                          | AO              |              |           | yes       | no                  | yes                  | A3288-02 |  |
|            |                   | Jan-16  |                         |                        |                                    |                      |               |        | 29                            | 85.5            | 53.9                          | AO              |              |           | yes       | no                  | yes                  | A3288-02 |  |
| LLC031     | Sep-09            | Nov-11  |                         |                        | 819.00                             | 1267.00              | mut           | neg    | 15                            | 71              | 63.3                          | AO              | No           | 2         | yes       | no                  | no                   |          |  |
|            |                   | May-15  |                         |                        |                                    |                      |               |        | 9                             | 79.7            | 64.3                          | AO              |              |           | yes       | no                  | no                   |          |  |
|            |                   | May-15  |                         |                        |                                    |                      |               |        | 9                             | 79.7            | 64.3                          | AO              |              |           | yes       | no                  | no                   |          |  |
| LLC035     | Oct-00            | Dec-11  |                         | Sep-18                 | 4084.00                            | 532.00               | mut           | neg    | 34.3                          | 84              | 84.8                          | BI              | No           | 2         | yes       | yes                 | yes                  | A2317-27 |  |
|            |                   | Jan-12  |                         |                        |                                    |                      |               |        | 23                            | 85              | 78.9                          | BI              |              |           | no        | yes                 | yes                  | A2317-28 |  |
|            |                   | Jan-12  |                         |                        |                                    |                      |               |        | 23                            | 85              | 78.9                          | BI              |              |           | no        | yes                 | yes                  | A2317-28 |  |
| LLC039     | Sep-05            | Jan-12  |                         | May-18                 | 2322.00                            | 1519.00              | mut           | neg    | 68                            | 89.7            | 95.5                          | BI              | No           | 2         | yes       | no                  | no                   |          |  |
|            |                   | Mar-16  |                         |                        |                                    |                      |               |        | 107                           | 90              | 89.5                          | BI              |              |           | yes       | no                  | no                   |          |  |
|            |                   | Mar-16  |                         |                        |                                    |                      |               |        | 107                           | 90              | 89.5                          | BI              |              |           | yes       | no                  | no                   |          |  |
| LLC052     | Jan-10            | Mar-12  |                         | Oct-17                 | 795.00                             | 378.00               | mut           | neg    | 29                            | 88              | 66.2                          | All             | No           | 2         | no        | yes                 | no                   |          |  |
|            |                   | Mar-13  |                         |                        |                                    |                      |               |        | 33                            | 90              | 87.7                          | BI              |              |           | no        | yes                 | no                   |          |  |
|            |                   | Mar-13  |                         |                        |                                    |                      |               |        | 33                            | 90              | 87.7                          | BI              |              |           | no        | yes                 | no                   |          |  |
| LLC056     | Aug-05            | Mar-12  |                         | Nov-17                 | 2416.00                            | 1372.00              | mut           | neg    | 29                            | 75.2            | 48.9                          | BI              | No           | 2         | yes       | no                  | no                   |          |  |
|            |                   | Dec-15  |                         |                        |                                    |                      |               |        | 33                            | 75              | 30.3                          | BI              |              |           | yes       | no                  | no                   |          |  |
|            |                   | Dec-15  |                         |                        |                                    |                      |               |        | 33                            | 75              | 30.3                          | BI              |              |           | yes       | no                  | no                   |          |  |
| LLC066     | Nov-11            | Sep-12  |                         | Jun-17                 | 329.00                             | 1178.00              | mut           | neg    | 12.8                          | 62              | 31.8                          | AO              | No           | 2         | yes       | no                  | yes                  | A3288-07 |  |
|            |                   | Dec-15  |                         |                        |                                    |                      |               |        | 15.7                          | 76.4            | 65.6                          | All             |              |           | yes       | no                  | yes                  | A3288-08 |  |
|            |                   | Dec-15  |                         |                        |                                    |                      |               |        | 15.7                          | 76.4            | 65.6                          | All             |              |           | yes       | no                  | yes                  | A3288-08 |  |
| LLC086     | Mar-10            | May-13  |                         | Apr-18                 | 1184.00                            | 966.00               | unmut         | neg    | 10                            | 70.1            | 37.2                          | AO              | No           | 2         | yes       | no                  | no                   |          |  |
|            |                   | Jan-16  |                         |                        |                                    |                      |               |        | 12                            | 74.5            | 48.8                          | AO              |              |           | yes       | no                  | no                   |          |  |
|            |                   | Jan-16  |                         | medan                  | 1268.00                            | 980.00               |               |        |                               |                 |                               |                 |              |           |           |                     |                      |          |  |

1 Patient included in the study (Visone et al. (2011))  
2 Patient recruited at Policlinico Gemelli, Rome, Italy  
- - LLC021 died in march 2018 (not CLL-related)  
\* - - CLL027 is the previous time point of 228 in Visone et al (2011)  
\*\*\* - - CLL233 is the previous time point of 234 in Visone et al (2011)  
\*\*\*\* - - LLC098 died in september 2018 (CLL-related)
